# Supplementary material for: Catalytically active coordination polymer with a tiny Zn2Se2ring bridged by bis-selone
Source: Royal Society of Chemistry journal article supplement (doi:10.1039/d0ra04577b), 2020-01-01
Supplement: d0ra04577b1.pdf [file d0ra04577b1.pdf]

### Supporting Information

| Contents         | Table of Contents                                                                                                                                                                | Page No |
|------------------|----------------------------------------------------------------------------------------------------------------------------------------------------------------------------------|---------|
| <b>Figure S1</b> | FT-IR spectrum of L.H <sub>2</sub> O (neat)                                                                                                                                      | 2       |
| <b>Figure S2</b> | <sup>1</sup> H NMR spectrum of L.H <sub>2</sub> O in CDCl <sub>3</sub> at RT                                                                                                     | 2       |
| <b>Figure S3</b> | <sup>13</sup> C NMR spectrum of L.H <sub>2</sub> O in CDCl <sub>3</sub> at RT                                                                                                    | 3       |
| <b>Figure S4</b> | FT-IR spectrum of <b>1</b> (neat)                                                                                                                                                | 3       |
| <b>Figure S5</b> | <sup>1</sup> H NMR spectrum of <b>1</b> in DMSO- <i>d</i> <sub>6</sub> at RT                                                                                                     | 4       |
| <b>Figure S6</b> | <sup>13</sup> C NMR spectrum of <b>1</b> in DMSO- <i>d</i> <sub>6</sub> at RT                                                                                                    | 4       |
| <b>Figure S7</b> | Solution state UV-vis spectra of L.H <sub>2</sub> O, and <b>1</b> in methanol at RT (2.9 × 10 <sup>-5</sup> M).                                                                  | 5       |
| <b>Figure S8</b> | <sup>1</sup> H NMR spectrum of the product isolated from the Knoevenagel condensation of 8-hydroxyquinoline-2-carbaldehyde with ethyl 2-cyanoacetate in CDCl <sub>3</sub> at RT. | 5       |

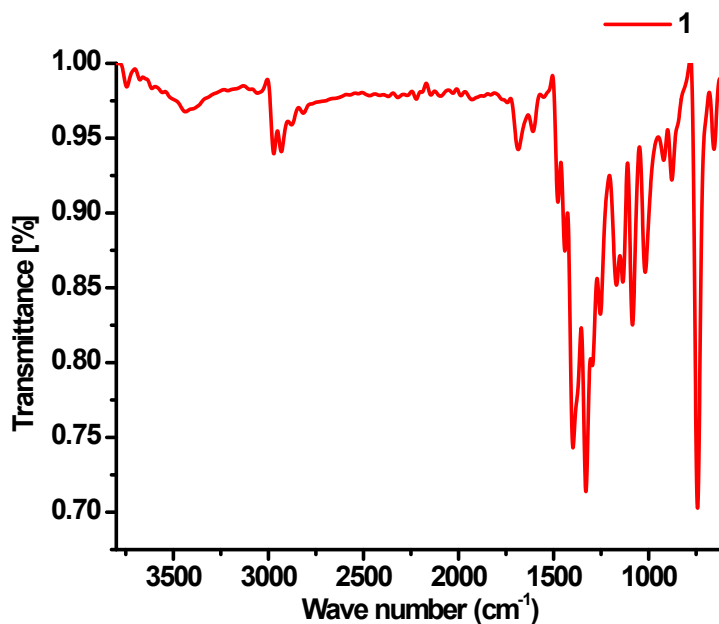

**Figure S1:** FT-IR spectrum of L.H<sub>2</sub>O (neat).

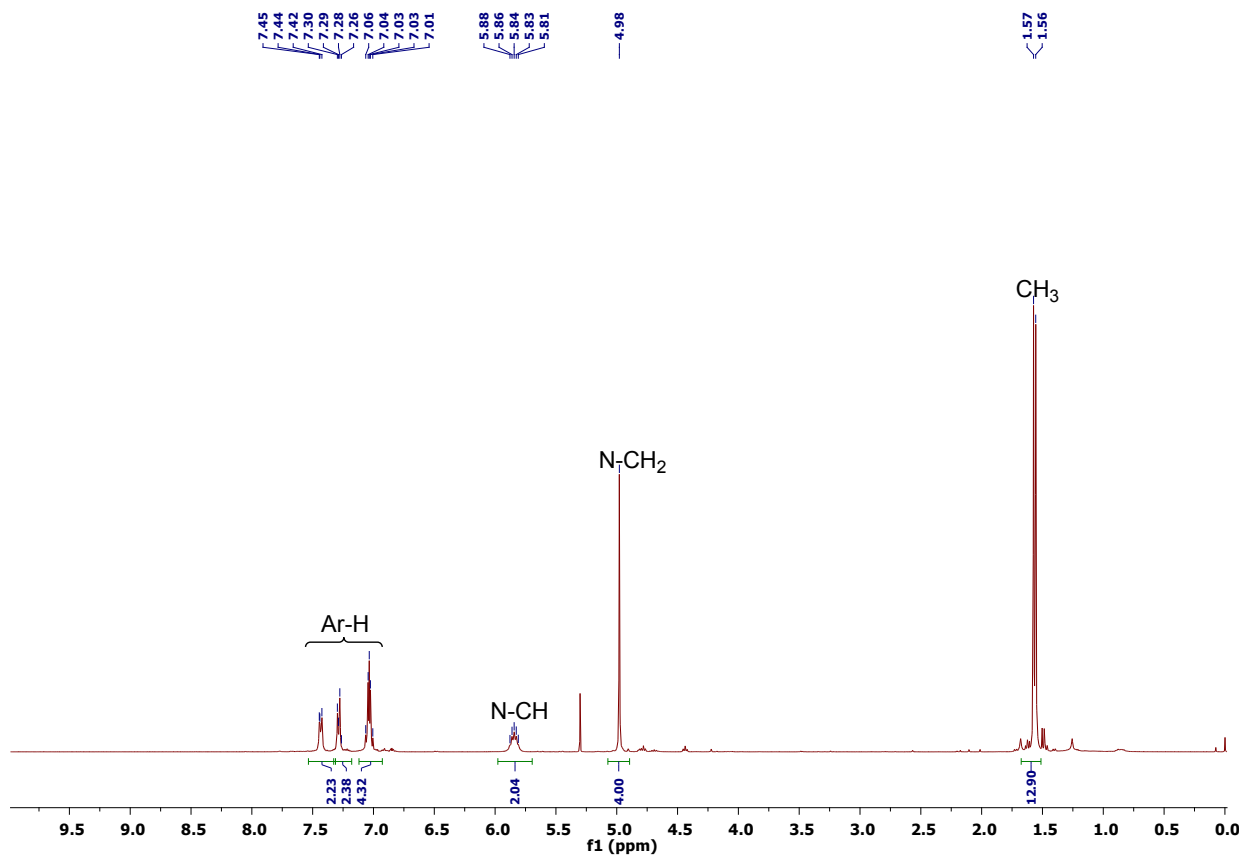

**Figure S2:** <sup>1</sup>H NMR spectrum of L.H<sub>2</sub>O in CDCl<sub>3</sub> at RT.

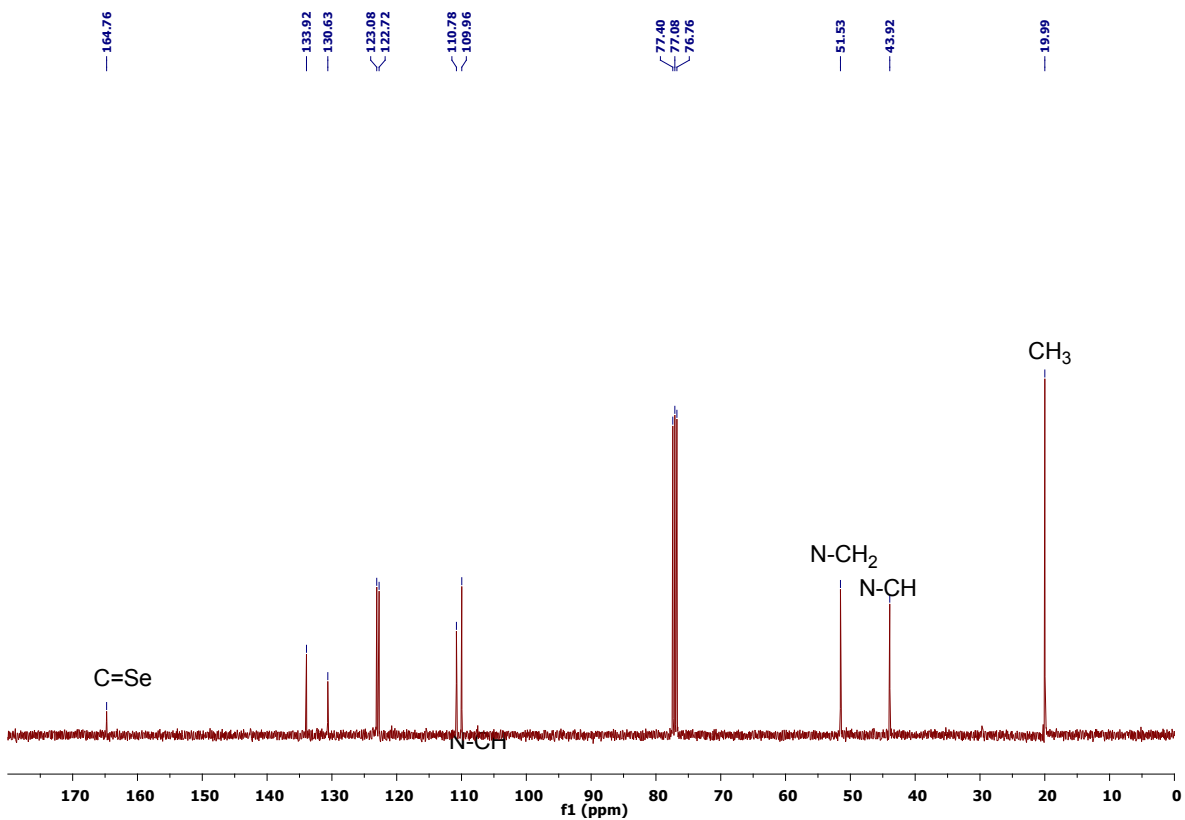

Figure S3:  $^{13}\text{C}$  NMR spectrum of L.H<sub>2</sub>O in CDCl<sub>3</sub> at RT.

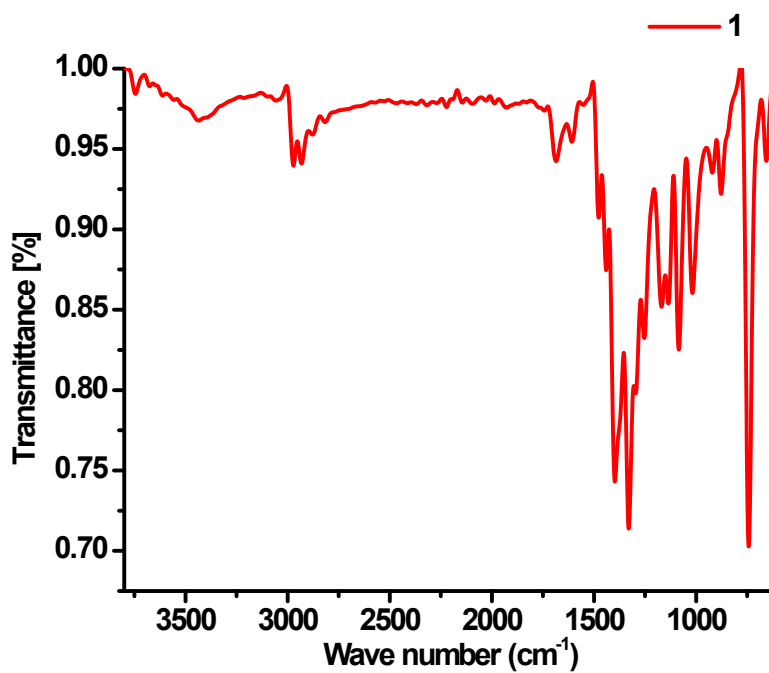

Figure S4: FT-IR spectrum of **1** (neat).

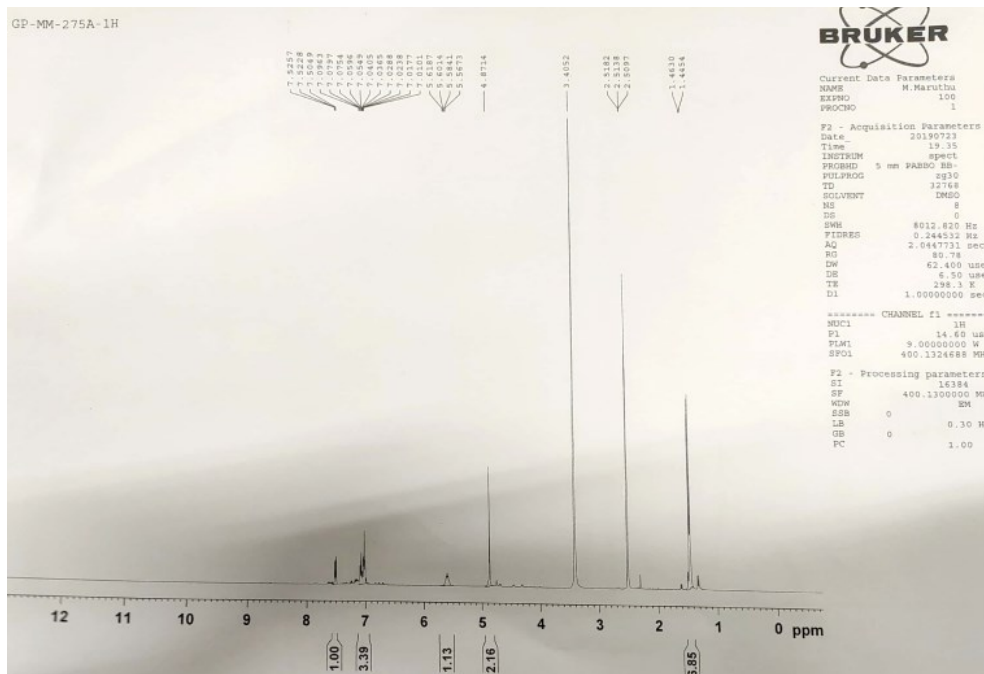

Figure S5:  $^1\text{H}$  NMR spectrum of **1** in DMSO- $d_6$  at RT.

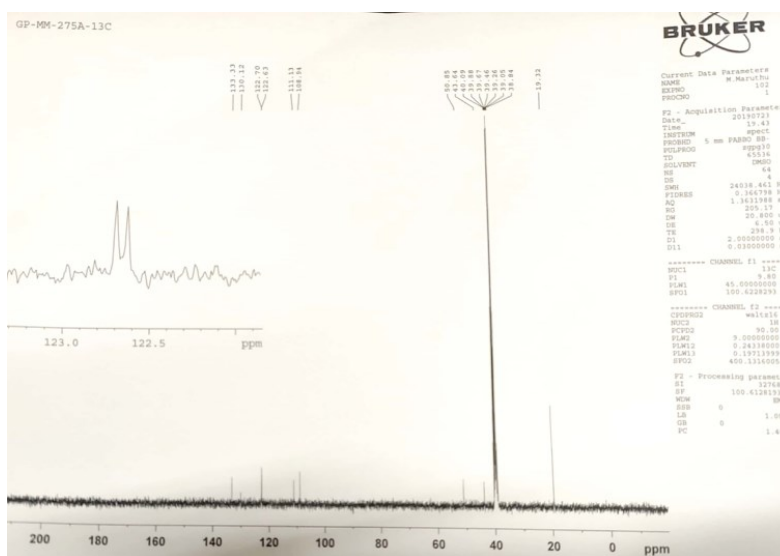

Figure S6:  $^{13}\text{C}$  NMR spectrum of **1** in DMSO- $d_6$  at RT.

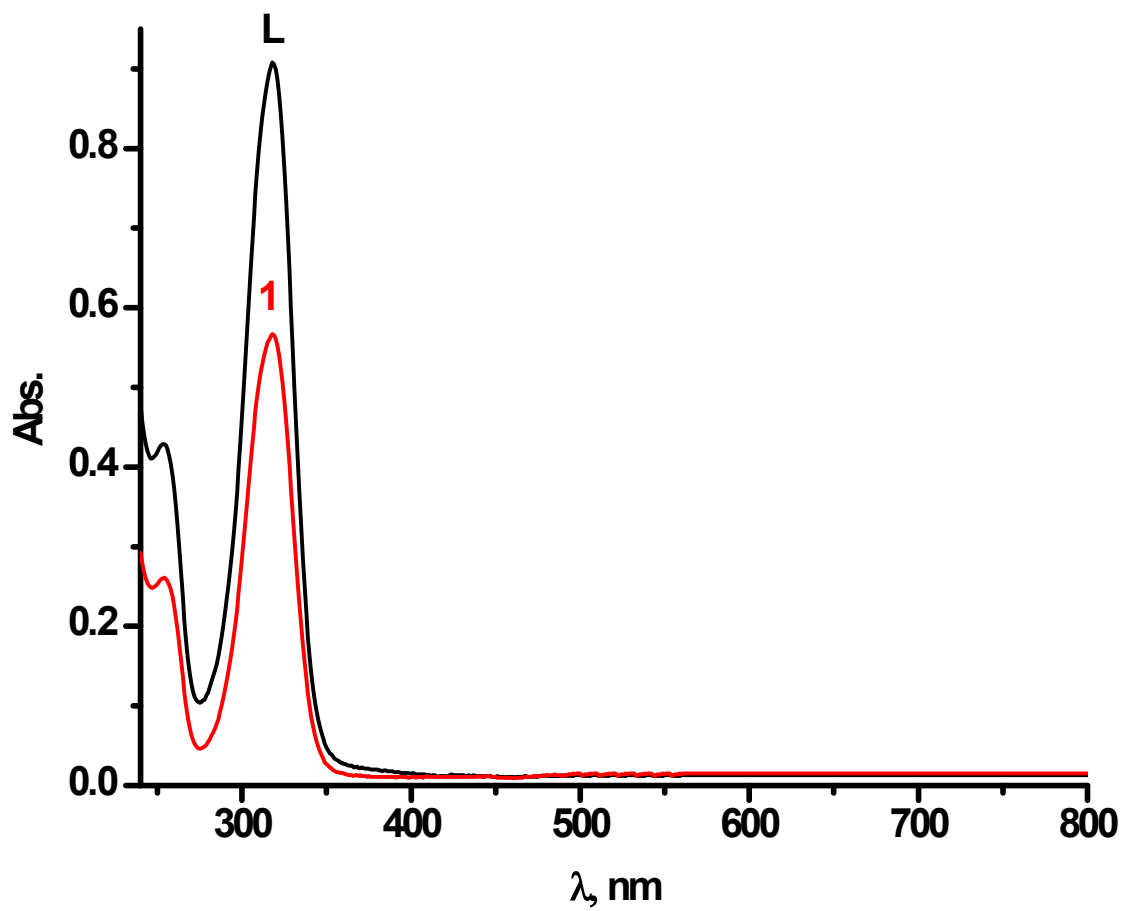

**Figure S7.** Solution state UV-vis spectra of L.H<sub>2</sub>O, and **1** in methanol at RT ( $2.9 \times 10^{-5}$  M).

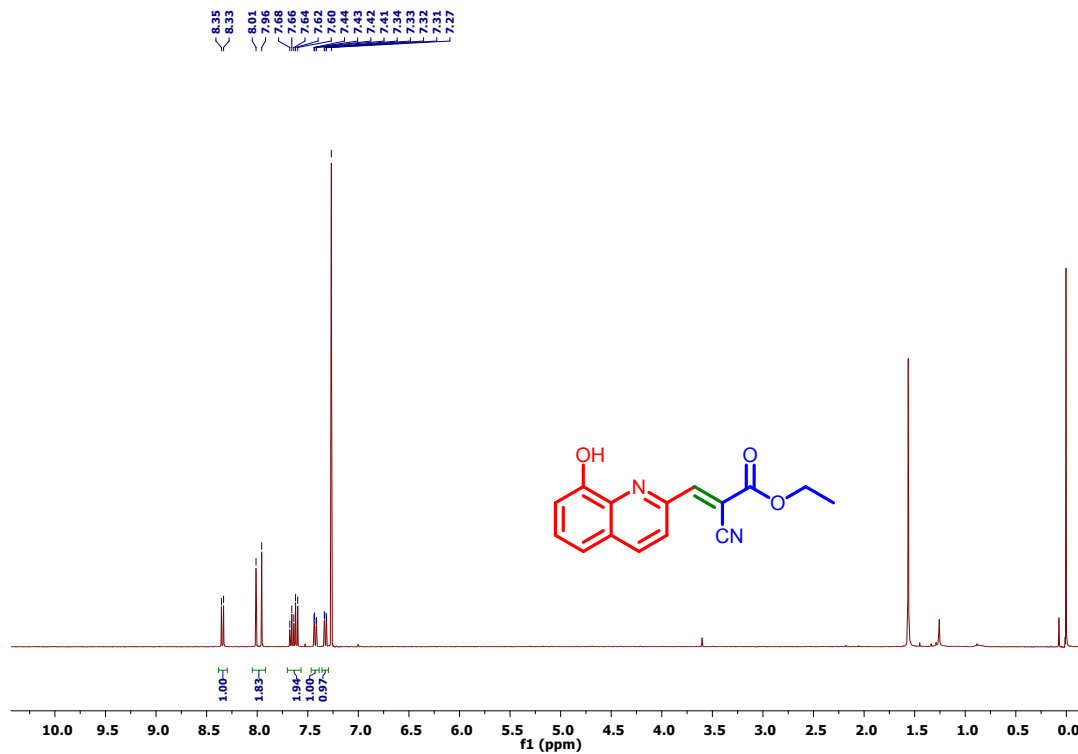

**Figure S8:** <sup>1</sup>H NMR spectrum of the product isolated from the Knoevenagel condensation of 8-hydroxyquinoline-2-carbaldehyde with ethyl 2-cyanoacetate in CDCl<sub>3</sub> at RT.
